# Supplementary material for: Green synthesis of a potential magnetic and mesoporous EG-nZVI/CA-MCM41 nanocomposite for reductive sorption of europium
Source: Royal Society of Chemistry journal article supplement (doi:10.1039/d3en00785e), 2024-01-01
Supplement: d3en00785e1.pdf [file d3en00785e1.pdf]

## **Green synthesis of potential magnetic-mesoporous EG-nZVI/CA-MCM-41 nanocomposite for reductive sorption of europium**

Ananya Jena<sup>a</sup>, Biswanth Mahanty<sup>b</sup>, Deepmoni Deka<sup>c</sup>, Prasanta Kumar Sahoo<sup>d</sup>, Sanghamitra Pradhan<sup>a</sup>, Prangya Ranjan Rout<sup>e</sup>, Sujata Mishra<sup>a</sup>, Naresh Kumar Sahoo<sup>a\*</sup>

*<sup>a</sup> Department of Chemistry, Environmental Science Program, (ITER), Siksha 'O' Anusandhan (Deemed to be University), Bhubaneswar-751030, Odisha, India*

*<sup>b</sup> Department of Biotechnology, Karunya Institute of Technology and Sciences, Coimbatore, India*

*<sup>c</sup> Center for the Environment, Indian Institute of Technology Guwahati, 781039, India*

*<sup>d</sup> Environmental Hydrology Division, National Institute of Hydrology, Jalvigyan Bhawan, Roorkee 247667, India*

*<sup>f</sup> Department of BioTechnology, Dr B R Ambedkar National Institute of Technology Jalandhar, India*

### **Supplementary Materials**

**Table S 1** comparative evaluation of the efficiency of various adsorbent systems for the removal of Eu (III)

| Adsorbent                                                       | Eu(III) capacity (mg/g) | Adsorption | References    |
|-----------------------------------------------------------------|-------------------------|------------|---------------|
| Zeolite                                                         | 24.39                   |            | [1]           |
| Activated carbon-epoxy composite                                | 292.62                  |            | [2]           |
| Activated Al <sub>2</sub> O <sub>3</sub>                        | 133.16                  |            | [3]           |
| MX-80 bentonite                                                 | 46.06                   |            | [4]           |
| NZVI@rGO                                                        | 96.675                  |            | [5]           |
| MnO <sub>2</sub> /graphene oxide                                | 83.5                    |            | [6]           |
| TiO <sub>2</sub> / (P (AAm-SSS))                                | 85.7                    |            | [7]           |
| Carboxyl functionalized Ti <sub>3</sub> C <sub>2</sub> Tx MXene | 97.1                    |            | [8]           |
| Crab Shell                                                      | 49.5                    |            | [9]           |
| Sr-HAP                                                          | 115.74                  |            | [10]          |
| (Mg-Cd)HAP                                                      | 137.31                  |            |               |
| EG-nZVI/CA-MCM-41                                               | 714.28                  |            | Current study |

## References

1. S. Khan, R. Anjum, M. Bilal, 2021. *Environ. Technol. Innov.* 2021, **22**, 101503.
2. H.S., Hassan, A. Lamis, G.A. Dakroury, *Appl. Radiat. Isot.* 2020, **164**, 109278.
3. H.S. Hassan, W.E. Madcour, E.K. Elmaghraby, *Mater. Chem. Phys.* 2019, **234**, 55–66.
4. Y. He, Y. Chen, W. Ye, X. Zhang, *Chem. Phys.* 2020, 534, 110742.
5. H. Zhu, H. Gao, X. Huang, W. Kong, X. Yan, 2015. *J. Environ. Chem. Eng.* 2015, **3**, 2974–2980.
6. J. Ma, Q. Zhao, L. Zhou, T. Wen, J., Wang, *Sci. Total Environ.* 2019, **695**, 133696.
7. E.H. Borai, M.M.E. Breky, M.S. Sayed, M.M. Abo-Aly, *J. Colloid Interface Sci.* 2015, **450**, 17–25.
8. P. Zhang, L. Wang, K. Du, S. Wang, Z. Huang, L. Yuan, Z. Li, H. Wang, L. Zheng, Z. Chai, W. Shi, *J Hazard. Mater.* 2020, **396**, 122731.

9. K. Vijayaraghavan, R. Balasubramanian, *Chemical Engineering Journal* 2010, **163**, 337–343.
10. R.R. Sheha, S.I. Moussa, M.A. Attia, S.A. Sadeek, H.H. Someda, *J. Environ. Chem. Eng.* 2016, **4**, 4808-4816
